# Supplementary material for: Anterior Papillary Muscle Rupture due to Acute Myocardial Microinfarction of the Small High Lateral Branch
Source: Case Rep Cardiol. 2022 Jul 8;2022:7149724. doi: 10.1155/2022/7149724 (PMC9286937; doi:10.1155/2022/7149724)
Supplement: Supplementary Materials — Videos 1 and 2: preoperative transthoracic (Video 1) and transesophageal (Video 2) echocardiography reveals severe mitral regurgitation due to papillary muscle rupture. Video 3: coronary angiography reveals a high-grade stenosis of the high lateral branch. However, no other lesions with significant stenosis were noted. [file 7149724.f1.zip]

Archive with 3 entries (3 files):
- Video 1.mp4
- Video 3.avi
- Viedo 2.mp4
